# Supplementary material for: Identification of preferentially exposed crystal facets by X-ray diffraction
Source: Royal Society of Chemistry journal article supplement (doi:10.1039/d0ra00769b), 2020-01-01
Supplement: d0ra00769b1.pdf [file d0ra00769b1.pdf]

# Identification of Preferentially Exposed Crystal Facets by X-ray Diffraction

Liping Zhang, Alexandre A. S. Gonçalves, and Mietek Jaroniec\*

Department of Chemistry and Biochemistry, Kent State University, Kent, Ohio 44242, USA

Table S1. Selected examples of crystalline materials with preferentially exposed facets and their applications

| Material                                             | Preferentially exposed facet(s) | Application                                                            | Ref. |
|------------------------------------------------------|---------------------------------|------------------------------------------------------------------------|------|
| Ag <sub>3</sub> PO <sub>4</sub> rhombic dodecahedron | {110}                           | Photocatalytic degradation of rhodamine B (RhB) and methyl orange (MO) | 1    |
| Ag <sub>3</sub> PO <sub>4</sub> cube                 | {100}                           |                                                                        |      |
| Bi <sub>2</sub> MoO <sub>6</sub> nanosheets          | {001}                           | Photocatalytic removal of NO                                           | 2    |
| BiOBr nanosheets                                     | {001}                           | Photocatalytic synthesis of NH <sub>3</sub> using N <sub>2</sub>       | 3    |
| BiOCl nanosheets                                     | {001} or {010}                  | Photocatalytic degradation of MO                                       | 4    |
| BiOCl nanosheets                                     | {001}                           | Photocatalytic RhB degradation                                         | 5    |
| BiOIO <sub>3</sub> nanoplates                        | {010} and {100}                 | Photocatalytic CO <sub>2</sub> reduction                               | 6    |
| BiVO <sub>4</sub> sheet                              | (040)                           | Photocatalytic H <sub>2</sub> O oxidation                              | 7    |
| BiVO <sub>4</sub> nanoplates                         | (040)                           | Photocatalytic H <sub>2</sub> O oxidation                              | 8    |
| BiVO <sub>4</sub> photoanode                         | (001)                           | Photoelectrochemical H <sub>2</sub> O oxidation                        | 9    |
| BiVO <sub>4</sub> nanosheets                         | {010}                           | Photocatalytic H <sub>2</sub> O oxidation                              | 10   |
| CeO <sub>2</sub> nanocubes                           | {100}                           | Oxygen storage                                                         | 11   |
| Co <sub>3</sub> O <sub>4</sub> nanosheets            | {112}                           | Catalytic oxidation of trace C <sub>2</sub> H <sub>4</sub>             | 12   |
| Mesoporous Co <sub>3</sub> O <sub>4</sub>            | {110}                           |                                                                        |      |
| Co <sub>3</sub> O <sub>4</sub> dodecahedra           | {111}                           | Photocatalytic CO <sub>2</sub> reduction                               | 13   |
| Co <sub>3</sub> O <sub>4</sub> cube                  | (001)                           | Anode material for Li-ion batteries                                    | 14   |
| Co <sub>3</sub> O <sub>4</sub> polyhedra             | (001) and (111)                 |                                                                        |      |
| Co <sub>3</sub> O <sub>4</sub> octahedra             | (111)                           |                                                                        |      |
| Fe <sub>2</sub> O <sub>3</sub> nanosheets            | (110)                           | Lithium storage and photocatalytic H <sub>2</sub> O oxidation          | 15   |
| Fe <sub>2</sub> PO <sub>5</sub> decahedra            | {010} and {110}                 | Electrocatalytic H <sub>2</sub> O oxidation                            | 16   |
| Fe <sub>2</sub> PO <sub>5</sub> octahedra            | {110}                           |                                                                        |      |
| CoP                                                  | (211)                           | Electrocatalytic O <sub>2</sub> reduction in zinc-air batteries        | 17   |
| Ni <sub>3</sub> S <sub>2</sub> nanosheets            | {210}                           | Electrocatalyst for overall H <sub>2</sub> O splitting                 | 18   |
| Pt nanocubes                                         | {100}                           | /                                                                      | 19   |
| Pt nanotetrahedra                                    | {111}                           |                                                                        |      |
| Pt hollow nanocubes                                  | {111}                           | Catalytic O <sub>2</sub> reduction in fuel cells                       | 20   |
| Pt nanoplates                                        | (111)                           | Electrocatalytic O <sub>2</sub> reduction                              | 21   |
| TiO <sub>2</sub> polyhedra                           | {001}                           | Photocatalytic decomposition of methylene blue                         | 22   |
| TiO <sub>2</sub> nanosheets                          | (001)                           | Lithium storage for Li-ion batteries                                   | 23   |
| TiO <sub>2</sub> (anatase) nanobelts                 | (101)                           | Photocatalytic degradation of MO                                       | 24   |
| TiO <sub>2</sub> (anatase) decahedra                 | {001}                           | /                                                                      | 25   |
| TiO <sub>2</sub> (anatase) decahedra                 | {101}                           | Photocatalytic reduction of fluorogenic molecules                      | 26   |
| TiO <sub>2</sub> (anatase) decahedra                 | {001} or {101}                  | Photocatalytic conversion of CH <sub>3</sub> OH into H <sub>2</sub>    | 27   |

## References

- 1 Y. Bi, S. Ouyang, N. Umezawa, J. Cao and J. Ye, *J. Am. Chem. Soc.*, 2011, **133**, 6490-6492.
- 2 S. Wang, X. Ding, X. Zhang, H. Pang, X. Hai, G. Zhan, W. Zhou, H. Song, L. Zhang, H. Chen and J. Ye, *Adv. Funct. Mater.*, 2017, **27**, 1703923.
- 3 X. Xue, R. Chen, H. Chen, Y. Hu, Q. Ding, Z. Liu, L. Ma, G. Zhu, W. Zhang, Q. Yu, J. Liu, J. Ma and Z. Jin, *Nano Lett.*, 2018, **18**, 7372-7377.

- 4 J. Jiang, K. Zhao, X. Xiao and L. Zhang, *J. Am. Chem. Soc.*, 2012, **134**, 4473-4476.
- 5 M. Guan, C. Xiao, J. Zhang, S. Fan, R. An, Q. Cheng, J. Xie, M. Zhou, B. Ye and Y. Xie, *Journal of the American Chemical Society*, 2013, **135**, 10411-10417.
- 6 F. Chen, H. Huang, L. Ye, T. Zhang, Y. Zhang, X. Han and T. Ma, *Adv. Funct. Mater.*, 2018, **28**, 1804284.
- 7 D. Wang, H. Jiang, X. Zong, Q. Xu, Y. Ma, G. Li and C. Li, *Chem. Eur. J.*, 2011, **17**, 1275-1282.
- 8 G. Xi and J. Ye, *Chemical Communications*, 2010, **46**, 1893.
- 9 H. S. Han, S. Shin, D. H. Kim, I. J. Park, J. S. Kim, P.-S. Huang, J.-K. Lee, I. S. Cho and X. Zheng, *Energy Environ. Sci.*, 2018, **11**, 1299-1306.
- 10 C. Dong, S. Lu, S. Yao, R. Ge, Z. Wang, Z. Wang, P. An, Y. Liu, B. Yang and H. Zhang, *ACS Catal.*, 2018, **8**, 8649-8658.
- 11 X. Hao, A. Yoko, C. Chen, K. Inoue, M. Saito, G. Seong, S. Takami, T. Adschiri and Y. Ikuhara, *Small*, 2018, **14**, 1802915.
- 12 C. Y. Ma, Z. Mu, J. J. Li, Y. G. Jin, J. Cheng, G. Q. Lu, Z. P. Hao and S. Z. Qiao, *J. Am. Chem. Soc.*, 2010, **132**, 2608-2613.
- 13 L. Wang, J. Wan, Y. Zhao, N. Yang and D. Wang, *J. Am. Chem. Soc.*, 2019, **141**, 2238-2241.
- 14 X. Xiao, X. Liu, H. Zhao, D. Chen, F. Liu, J. Xiang, Z. Hu and Y. Li, *Adv. Mater.*, 2012, **24**, 5762-5766.
- 15 J. Zhu, Z. Yin, D. Yang, T. Sun, H. Yu, H. E. Hoster, H. H. Hng, H. Zhang and Q. Yan, *Energy Environ. Sci.*, 2013, **6**, 987-993.
- 16 Y. Wu, Y. Meng, J. Hou, S. Cao, Z. Gao, Z. Wu and L. Sun, *Adv. Funct. Mater.*, 2018, **28**, 1801397.
- 17 H. Li, Q. Li, P. Wen, T. B. Williams, S. Adhikari, C. Dun, C. Lu, D. Itanze, L. Jiang, D. L. Carroll, G. L. Donati, P. M. Lundin, Y. Qiu and S. M. Geyer, *Adv. Mater.*, 2018, **30**, 1705796.
- 18 L.-L. Feng, G. Yu, Y. Wu, G.-D. Li, H. Li, Y. Sun, T. Asefa, W. Chen and X. Zou, *J. Am. Chem. Soc.*, 2015, **137**, 14023-14026.
- 19 C.-Y. Chiu, Y. Li, L. Ruan, X. Ye, C. B. Murray and Y. Huang, *Nat. Chem.*, 2011, **3**, 393.
- 20 W. Wang, X. Li, T. He, Y. Liu and M. Jin, *Nano Lett.*, 2019, **19**, 1743-1748.
- 21 H. Liu, P. Zhong, K. Liu, L. Han, H. Zheng, Y. Yin and C. Gao, *Chem. Sci.*, 2018, **9**, 398-404.
- 22 S. Liu, J. Yu and M. Jaroniec, *J. Am. Chem. Soc.*, 2010, **132**, 11914-11916.
- 23 J. S. Chen, Y. L. Tan, C. M. Li, Y. L. Cheah, D. Luan, S. Madhavi, F. Y. C. Boey, L. A. Archer and X. W. Lou, *J. Am. Chem. Soc.*, 2010, **132**, 6124-6130.
- 24 N. Wu, J. Wang, D. N. Tafen, H. Wang, J.-G. Zheng, J. P. Lewis, X. Liu, S. S. Leonard and A. Manivannan, *J. Am. Chem. Soc.*, 2010, **132**, 6679-6685.
- 25 H. G. Yang, C. H. Sun, S. Z. Qiao, J. Zou, G. Liu, S. C. Smith, H. M. Cheng and G. Q. Lu, *Nature*, 2008, **453**, 638-641.
- 26 T. Tachikawa, S. Yamashita and T. Majima, *J. Am. Chem. Soc.*, 2011, **133**, 7197-7204.
- 27 T. R. Gordon, M. Cargnello, T. Paik, F. Mangolini, R. T. Weber, P. Fornasiero and C. B. Murray, *J. Am. Chem. Soc.*, 2012, **134**, 6751-6761.

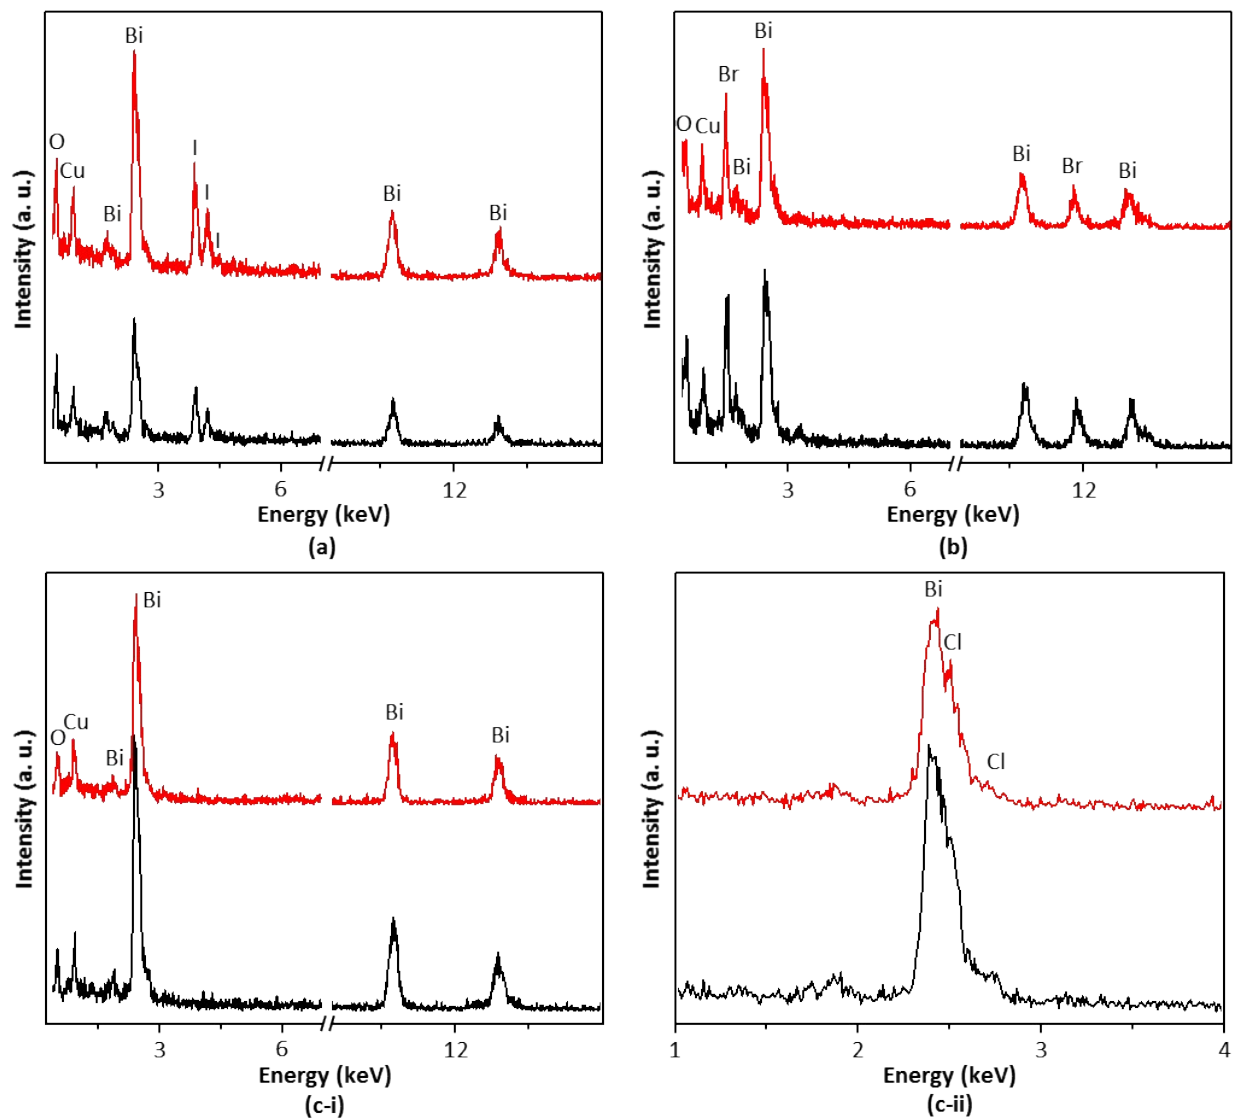

Fig. S1 EDX spectra recorded at two different areas of the synthesized (a) BiOI, (b) BiOBr, and (c) BiOCl samples. The peaks of Cu are attributable to the use of Cu grids.

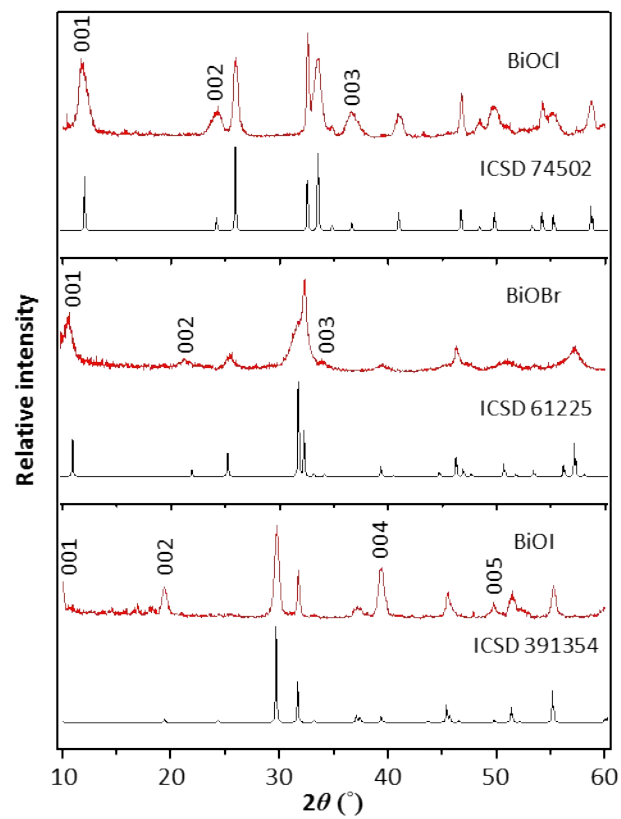

Fig. S2 XRD patterns of the synthesized BiOX samples.

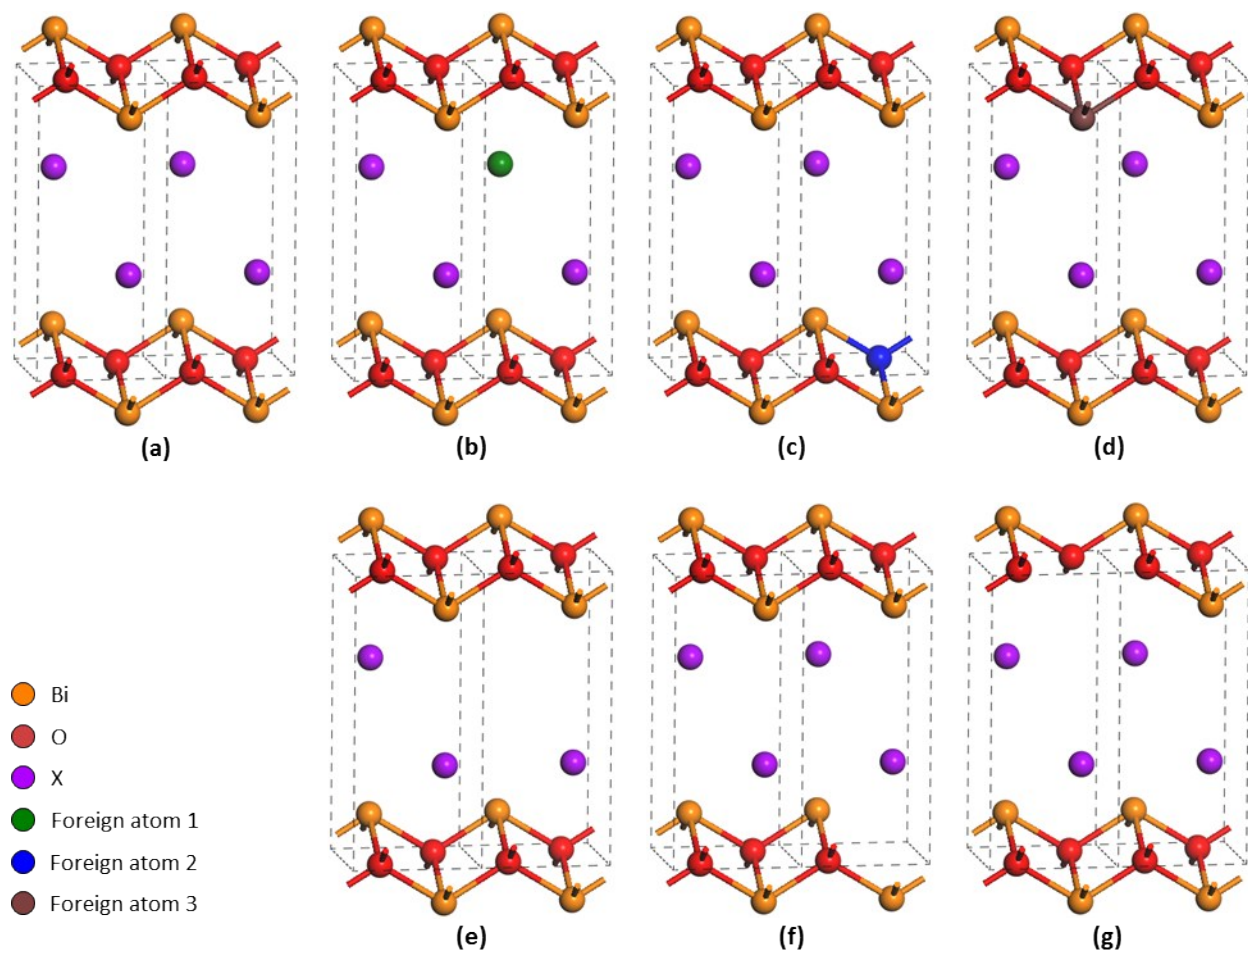

Fig. S3 Crystal structures of (a) BiOX, (b)-(d) BiOX doped with foreign ions, and (e-g) BiOX with vacancies.

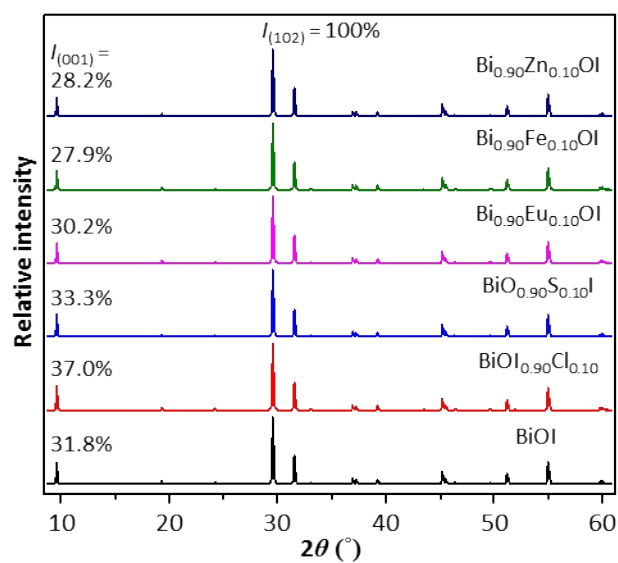

Fig. S4 Simulated XRD patterns of BiOI doped with various elements.

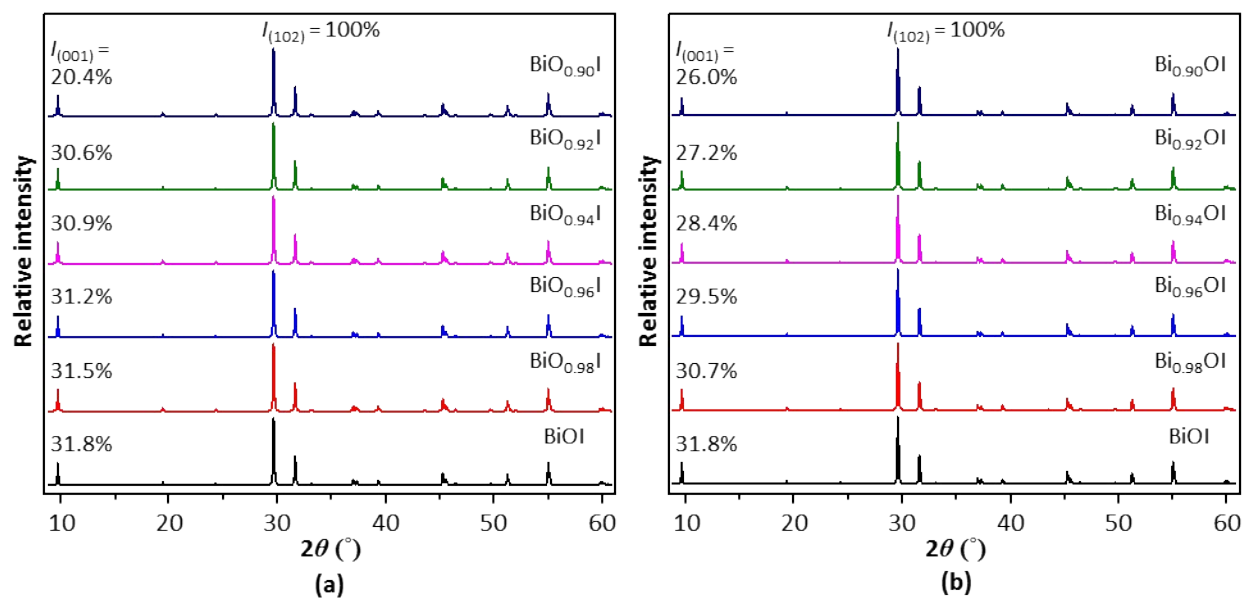

Fig. S5 Simulated XRD patterns of BiOI with various amounts of (a) O and (b) Bi vacancies.

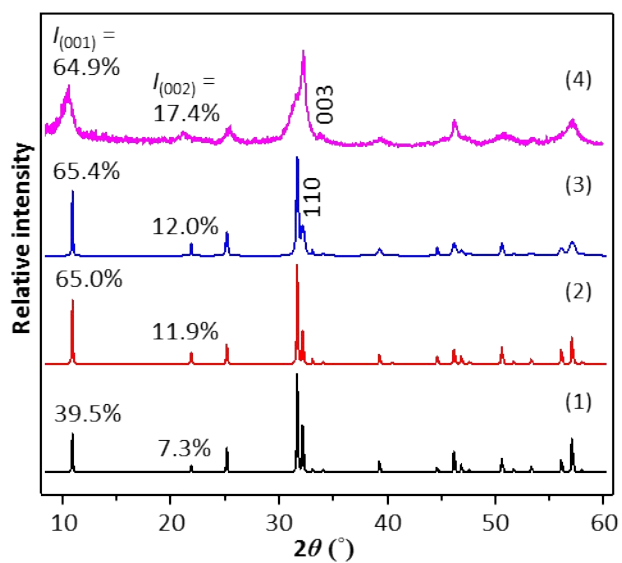

Fig. S6 Simulated (1-3) and experimental (4) XRD patterns of BiOBr. Pattern 1, bulk BiOBr without preferred orientation or anisotropic broadening; pattern 2, preferred orientation in [001] (March/Dollase parameter = 0.828); pattern 3, (110) broadening (anisotropic parameter = 1.5).

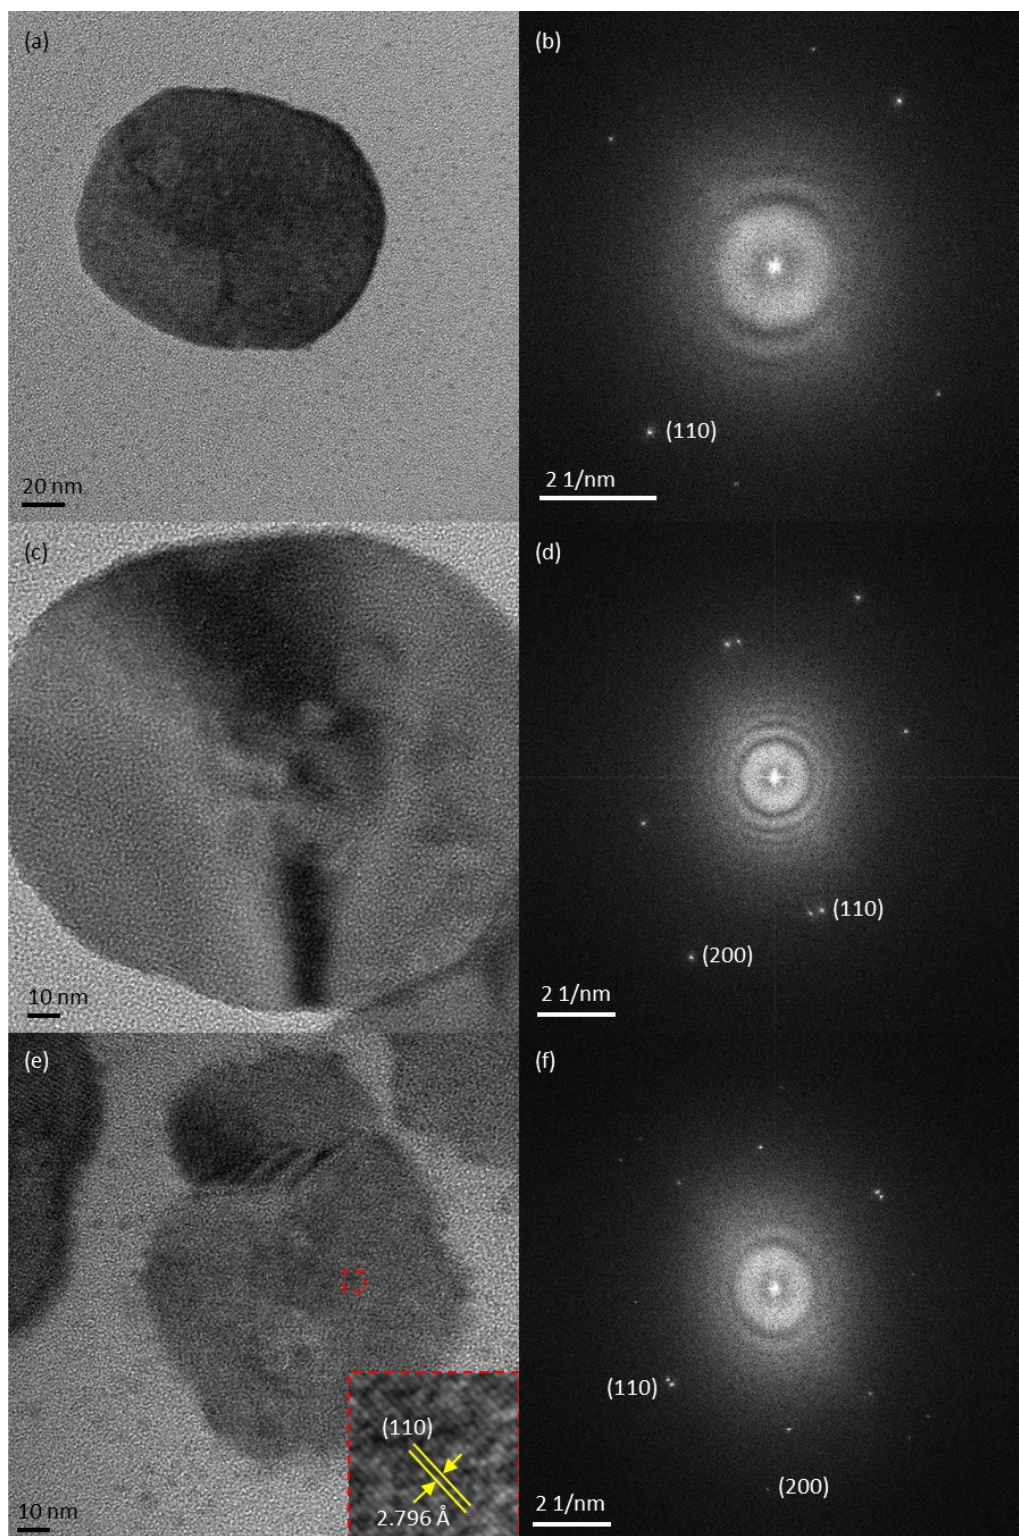

Fig. S7 (a, c, e) TEM images of BiOI nanoplates and (b, d, f) the corresponding fast Fourier transforms (FFTs). The insert of (e) is the magnified image of the red frame-enclosed area.



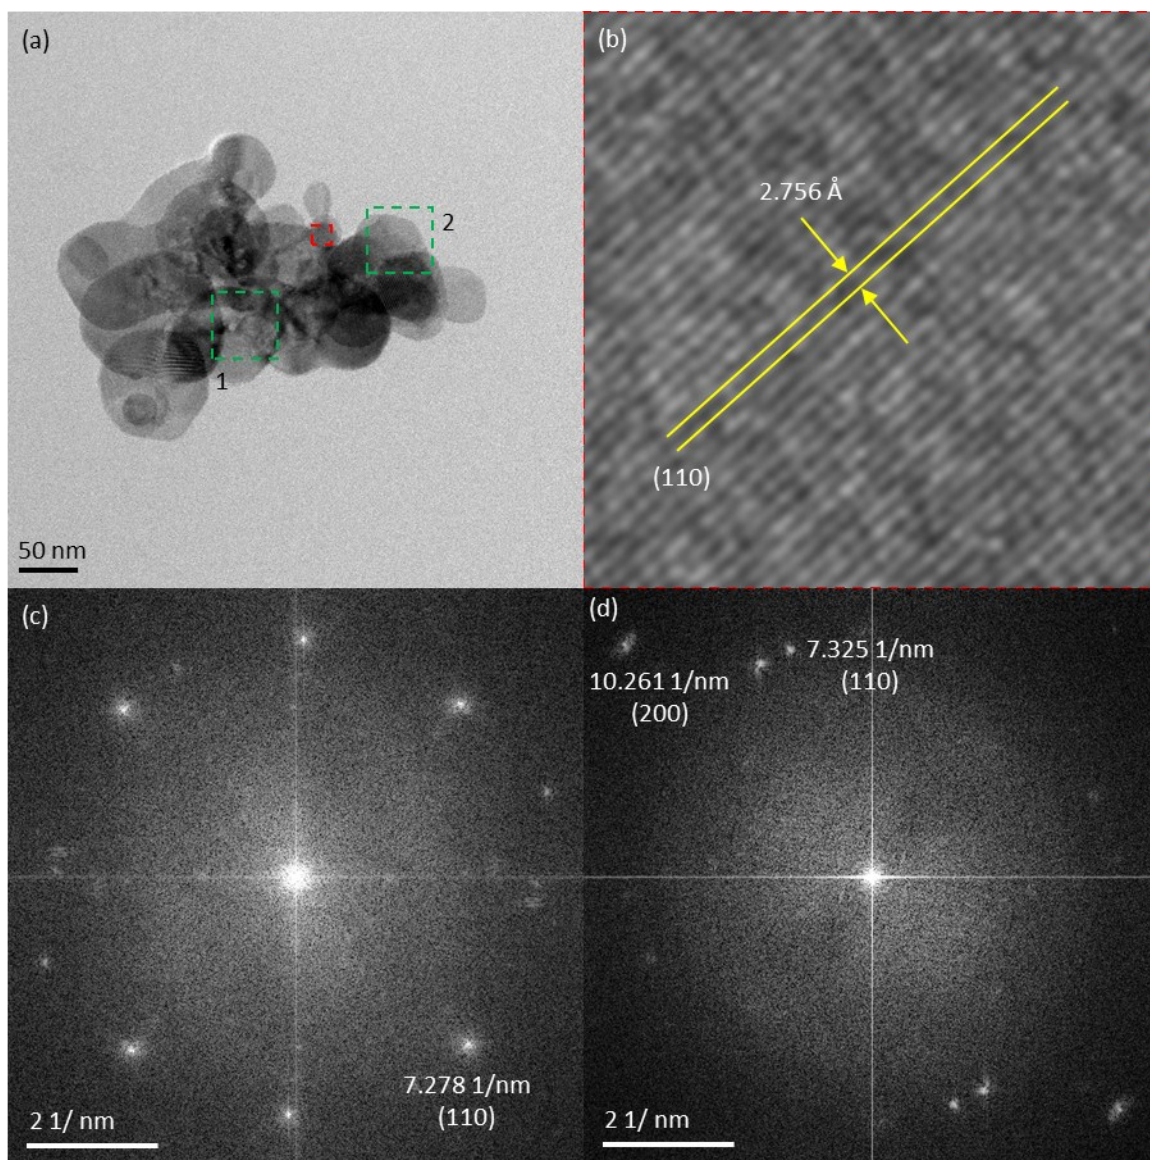

Fig. S8 (a) TEM image of BiOCl, (b) magnified image of the red frame-enclosed area, (c) and (d) FFTs of the green-colored frames 1 and 2, respectively, in (a).
